# Supplementary material for: Predictive modelling of the distribution of Clematis sect. Fruticella s. str. under climate change reveals a range expansion during the Last Glacial Maximum
Source: PeerJ. 2020 Mar 9;8:e8729. doi: 10.7717/peerj.8729 (PMC7067196; doi:10.7717/peerj.8729)
Supplement: Table S1 [file peerj-08-8729-s001.xlsx]

## Sheet: C. fruticosa
Species	East Longitude (°)	Northern Latitude (°)
Clematis fruticosa	103.83	36.009
Clematis fruticosa	104.443	34.0018
Clematis fruticosa	108.139	35.4589
Clematis fruticosa	108.535	36.08
Clematis fruticosa	108.692	36.1361
Clematis fruticosa	108.386	36.1154
Clematis fruticosa	107.157	36.0219
Clematis fruticosa	115.317	40.9752
Clematis fruticosa	114.935	39.8665
Clematis fruticosa	114.946	39.8782
Clematis fruticosa	114.521	40.0819
Clematis fruticosa	115.37	40.0908
Clematis fruticosa	115.369	40.1318
Clematis fruticosa	110.067	41.0649
Clematis fruticosa	110.187	40.6565
Clematis fruticosa	110.314	40.7939
Clematis fruticosa	110.315	40.7949
Clematis fruticosa	110.563	40.6926
Clematis fruticosa	109.462	40.6664
Clematis fruticosa	109.557	40.6859
Clematis fruticosa	112.244	40.7335
Clematis fruticosa	113.159	41.8473
Clematis fruticosa	112.464	40.957
Clematis fruticosa	113.16	41.7498
Clematis fruticosa	111.335	39.825
Clematis fruticosa	111.845	40.9734
Clematis fruticosa	106.643	35.7193
Clematis fruticosa	106.167	38.8863
Clematis fruticosa	106.283	39.1227
Clematis fruticosa	106.117	39.0619
Clematis fruticosa	106.057	38.8147
Clematis fruticosa	106.393	37.115
Clematis fruticosa	106.395	37.114
Clematis fruticosa	113.736	39.6426
Clematis fruticosa	113.428	39.7754
Clematis fruticosa	112.006	36.9845
Clematis fruticosa	111.96	36.8876
Clematis fruticosa	111.956	36.8934
Clematis fruticosa	110.952	36.6789
Clematis fruticosa	111.111	36.6345
Clematis fruticosa	110.548	36.7796
Clematis fruticosa	111.544	37.9407
Clematis fruticosa	111.684	38.3054
Clematis fruticosa	111.283	37.6122
Clematis fruticosa	110.971	37.8355
Clematis fruticosa	110.9	38.1198
Clematis fruticosa	110.88	38.0916
Clematis fruticosa	110.814	37.5545
Clematis fruticosa	111.038	38.4801
Clematis fruticosa	111.217	37.3526
Clematis fruticosa	111.205	37.3535
Clematis fruticosa	111.276	37.1697
Clematis fruticosa	111.217	37.2623
Clematis fruticosa	111.345	37.7736
Clematis fruticosa	112.501	36.6515
Clematis fruticosa	112.182	39.4528
Clematis fruticosa	112.444	39.7893
Clematis fruticosa	112.445	37.9791
Clematis fruticosa	111.225	39.0327
Clematis fruticosa	111.105	38.9961
Clematis fruticosa	113.642	39.1348
Clematis fruticosa	112.336	39.0812
Clematis fruticosa	111.869	39.4327
Clematis fruticosa	113.549	38.7254
Clematis fruticosa	113.523	38.5932
Clematis fruticosa	111.865	38.8792
Clematis fruticosa	109.313	36.8696
Clematis fruticosa	109.102	36.7501
Clematis fruticosa	109.179	36.0792
Clematis fruticosa	109.847	35.5946
Clematis fruticosa	109.66	36.2807
Clematis fruticosa	109.538	36.6807
Clematis fruticosa	108.18	36.9323
Clematis fruticosa	108.511	37.1767
Clematis fruticosa	110.166	36.0597
Clematis fruticosa	108.763	36.8144
Clematis fruticosa	109.682	37.1383
Clematis fruticosa	109.246	37.8203
Clematis fruticosa	109.667	38.0272
Clematis fruticosa	109.654	38.0196
Clematis fruticosa	108.974	37.4945
Clematis fruticosa	108.602	37.4428
Clematis fruticosa	110.138	37.775
Clematis fruticosa	109.81	38.2836
Clematis fruticosa	110.897	38.6659
Clematis fruticosa	110.213	37.5056
Clematis fruticosa	103.72	33.9434
Clematis fruticosa	110.448	41.7049
Clematis fruticosa	112.525	40.8894
Clematis fruticosa	91.3927	46.4997
Clematis fruticosa	107.989	43.5222
Clematis fruticosa	98.8523	44.6128
Clematis fruticosa	100.365	45.0456
Clematis fruticosa	113.54	46.5685
Clematis fruticosa	116.266	40.591
Clematis fruticosa	115.695	39.8487
Clematis fruticosa	104.011	34.4541
Clematis fruticosa	110.516	40.6147
Clematis fruticosa	107.271	37.8728
Clematis fruticosa	108.176	36.9291
Clematis fruticosa	111.625	37.3296

## Sheet: C. canescens
Species	East Longitude (°)	Northern Latitude (°)
Clematis canescens	115.091	43.6759
Clematis canescens	110.98	42.6505
Clematis canescens	112.048	42.0714
Clematis canescens	111.859	41.727
Clematis canescens	111.399	42.6227
Clematis canescens	111.032	42.7098
Clematis canescens	111.032	42.7989
Clematis canescens	110.079	44.9362

## Sheet: C. nannophylla
Species	East Longitude (°)	Northern Latitude (°)
Clematis nannophylla	104.111	36.5401
Clematis nannophylla	104.116	36.545
Clematis nannophylla	104.141	37.1214
Clematis nannophylla	104.574	37.1639
Clematis nannophylla	104.29	35.8314
Clematis nannophylla	103.815	35.3841
Clematis nannophylla	104.224	35.1237
Clematis nannophylla	103.956	33.9998
Clematis nannophylla	102.516	35.2064
Clematis nannophylla	104.183	33.8706
Clematis nannophylla	103.619	36.1704
Clematis nannophylla	103.865	36.0056
Clematis nannophylla	103.672	36.0299
Clematis nannophylla	102.847	36.5999
Clematis nannophylla	103.231	36.7267
Clematis nannophylla	102.747	36.7442
Clematis nannophylla	102.807	36.6809
Clematis nannophylla	103.029	36.6516
Clematis nannophylla	105.097	37.0714
Clematis nannophylla	105.604	37.0845
Clematis nannophylla	102.528	36.812
Clematis nannophylla	102.251	36.0838
Clematis nannophylla	102.387	36.6578
Clematis nannophylla	102.808	36.3754
Clematis nannophylla	102.165	36.5069
Clematis nannophylla	102.481	35.8351
Clematis nannophylla	102.729	35.8117
Clematis nannophylla	102.647	35.8296
Clematis nannophylla	100.941	36.133
Clematis nannophylla	101.569	36.2281
Clematis nannophylla	102.643	36.8337
Clematis nannophylla	102.016	35.9353
Clematis nannophylla	102.06	35.7273
Clematis nannophylla	102.195	35.561
Clematis nannophylla	101.826	35.6794
Clematis nannophylla	101.917	36.5639
Clematis nannophylla	101.829	36.5665
Clematis nannophylla	101.864	36.5846
Clematis nannophylla	102.836	36.6086
Clematis nannophylla	105.854	38.8174
Clematis nannophylla	105.929	37.0522
Clematis nannophylla	101.647	36.9263
Clematis nannophylla	101.416	36.1042

## Sheet: C. tomentella
Species	East Longitude (°)	Northern Latitude (°)
Clematis tomentella	102.415	38.3581
Clematis tomentella	95.3014	40.2756
Clematis tomentella	97.1631	40.1978
Clematis tomentella	98.9179	40.1806
Clematis tomentella	99.1193	40.0874
Clematis tomentella	100.988	38.9142
Clematis tomentella	98.5382	40.969
Clematis tomentella	96.9668	41.5514
Clematis tomentella	97.6915	40.4419
Clematis tomentella	95.4918	40.3445
Clematis tomentella	101.081	38.8346
Clematis tomentella	101.147	38.8153
Clematis tomentella	101.149	38.9431
Clematis tomentella	99.5567	39.2323
Clematis tomentella	101.791	39.5906
Clematis tomentella	101.585	39.2171
Clematis tomentella	101.082	42.0066
Clematis tomentella	105.082	38.9974
Clematis tomentella	99.728	40.5666
Clematis tomentella	106.943	41.433
Clematis tomentella	109.863	40.2997
Clematis tomentella	108.981	38.8116
Clematis tomentella	106.793	38.7838
Clematis tomentella	106.752	38.7959
Clematis tomentella	105.444	37.3806
Clematis tomentella	107.426	37.0098
Clematis tomentella	115.6	39.9452
Clematis tomentella	99.9931	38.5037
Clematis tomentella	97.4975	43.3186

## Sheet: C. viridis
Species	East Longitude (°)	Northern Latitude (°)
Clematis viridis	98.2155	31.5026
Clematis viridis	98.3911	31.5937
Clematis viridis	98.5957	31.6242
Clematis viridis	98.5491	31.5688
Clematis viridis	98.5799	31.6011
Clematis viridis	98.5895	31.6294
Clematis viridis	102.455	31.2276
Clematis viridis	100.725	31.8761
Clematis viridis	102.302	31.8731
Clematis viridis	101.764	30.7956
Clematis viridis	98.5985	31.8377
Clematis viridis	98.4213	32.0202
Clematis viridis	98.5658	31.7184
Clematis viridis	98.5926	31.6217
Clematis viridis	98.703	31.5305
Clematis viridis	98.7808	31.2482
Clematis viridis	98.8314	31.2117
Clematis viridis	97.4414	32.692
Clematis viridis	97.2494	32.9675
